# Supplementary figures and images for: The C. elegans neural editome reveals an ADAR target mRNA required for proper chemotaxis
Source: eLife journal article supplement (doi:10.7554/elife.28625), 2017-09-19

Figure 6. Supplement 1

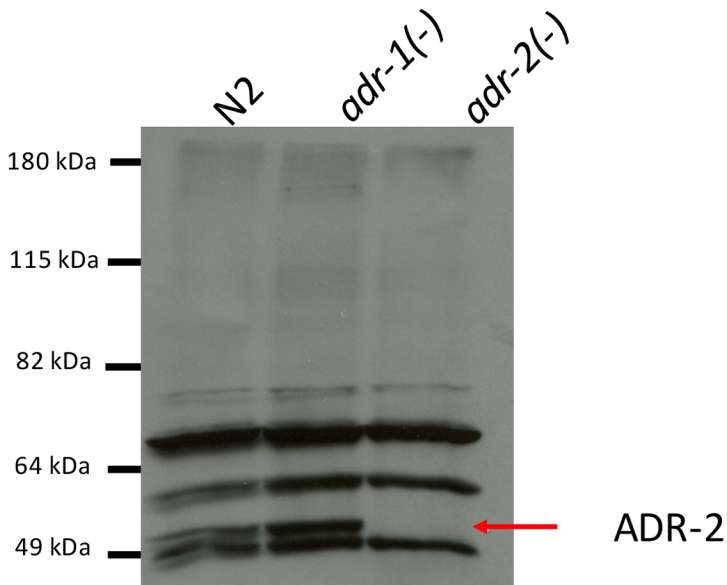

Supplement: supp [file elife-28625-supp-v1.zip]

Figure 5. Supplement 1

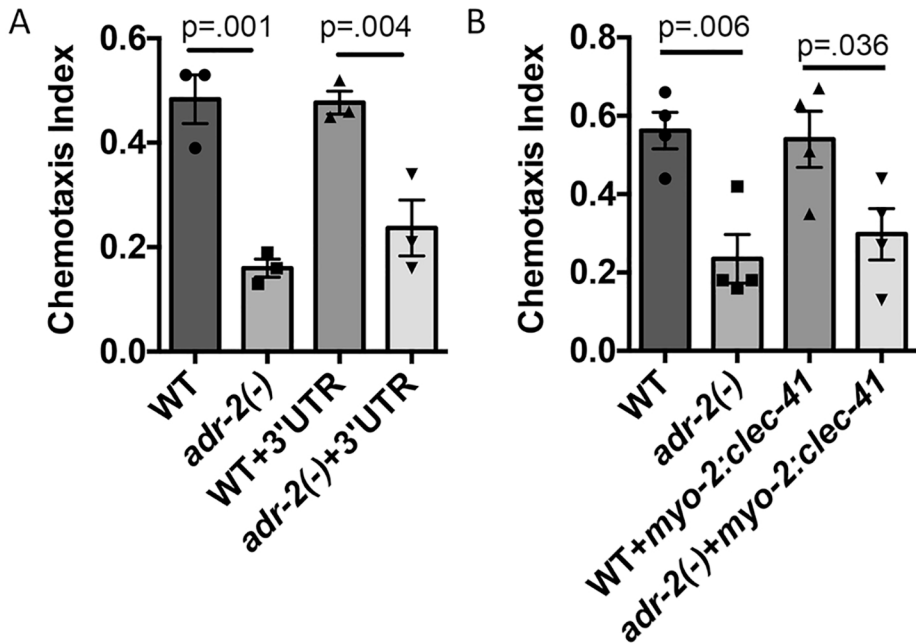

Supplement: supp [file elife-28625-supp-v1.zip]

Figure 4. Supplement 1

A

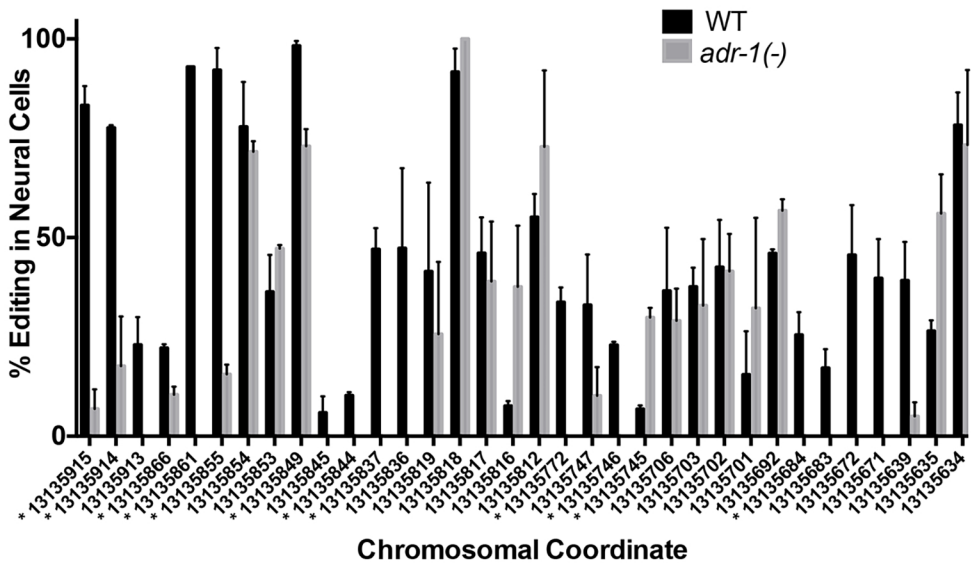

B

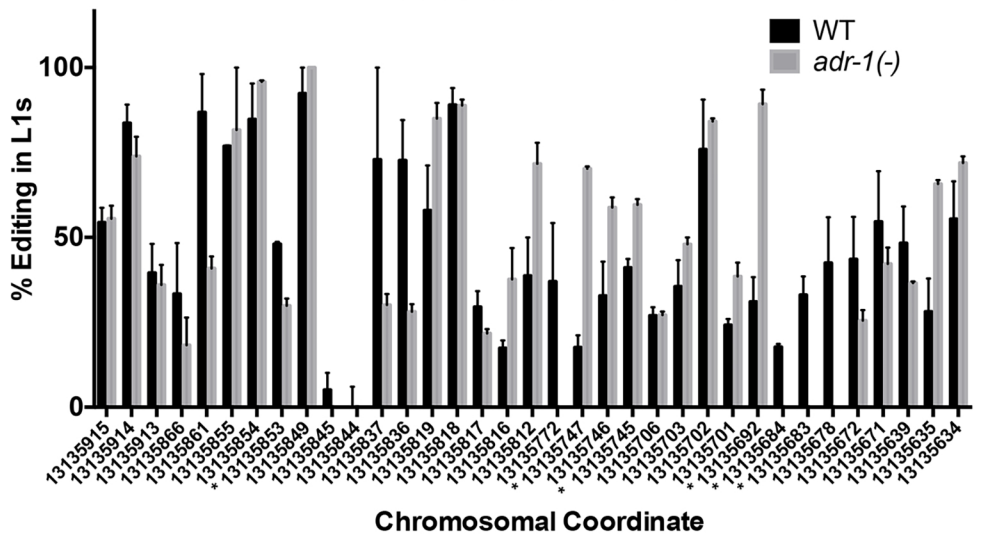

Supplement: supp [file elife-28625-supp-v1.zip]
